# Supplementary material
Source: PubMed Central journal article supplement (PMC2749143)
Supplement: supp_M109.011700_jbc.M109.011700-1.pdf [file supp_M109.011700_jbc.M109.011700-1.pdf]

# Supplementary Material for: Dynamically Driven Ligand Selectivity in Cyclic Nucleotide Binding Domains\*

Rahul Das, Somenath Chowdhury, Mohammad T. Mazhab-Jafari, Soumita SilDas, Rajeevan Selvaratnam  
and Giuseppe Melacini

*Departments of Chemistry, Biochemistry and Biomedical Sciences, McMaster University,  
1280 Main St. W., Hamilton, Ontario, CANADA L8S 4M1*

Running Title: Dynamically Driven Ligand Selectivity.

Address correspondence to: Giuseppe Melacini, Departments of Chemistry, Biochemistry and Biomedical Sciences, McMaster University, 1280 Main St. W., Hamilton, Ontario, CANADA L8S 4M1, Tel.: (905) 525-9140 ext. 26959; Fax: (905) 522-2509; Email: [melacin@mcmaster.ca](mailto:melacin@mcmaster.ca)

*Measurement of Intra-Molecular cNMP Distances.* For the purpose of experimentally determining intra-nucleotide  $^1\text{H}$ - $^1\text{H}$  distances, the cAMP resonances were assigned using 2D-homonuclear TOCSY experiment and the contributions from the partially overlapped resonances of H2 and H8 (Fig. 3a, top trace) were separated by comparing the spectra acquired for cAMP and  $d_8$ -cAMP (Fig. 3a, bottom trace). The inter-proton distances in free cAMP and cGMP in solution were evaluated using off-resonance ROESY experiments, which are suitable for low MW ligands, whereas the inter-proton distances of EPAC-bound cAMP and cGMP were measured from transfer NOEs measured through  $^{15}\text{N}/^{13}\text{C}$  double-filtered edited NOESY experiments. These experiments take advantage of the chemical exchange observed between free and EPAC-bound cNMPs (Fig. 3b), while at the same time suppressing background protein-to-protein NOEs through isotopic filtration.

*Assignment of cGMP-Bound RI $\alpha$  (119-244) and EPAC1 $_h$  (149 – 318).* The  $^1\text{H}$  and  $^{15}\text{N}$  amide chemical shifts of the cGMP-bound state of RI $\alpha$  (119-244) were assigned through  $\text{N}_2$ -exchange experiments, which take advantage of the slow exchange between cAMP and cGMP in a sample with NMR-observable amounts of both cAMP-bound and cGMP-bound RI $\alpha$  (119–244). However, for EPAC1 $_h$  (149 – 318) the exchange between cAMP- and cGMP-bound states falls outside the slow regime and therefore the  $^1\text{H}$  and  $^{15}\text{N}$  amide chemical shift assignments of the cGMP:EPAC1 $_h$  (149 – 318) complex were obtained using 3D triple-resonance experiments.

*Correlation between Maximal Protection Factors and  $K_D$  Values.* The maximal protection factors observed for the highly buried inner strands of the  $\beta$ -barrel (*i.e.*  $\beta_3$ , 4, 7 and 8) correspond to transient global unfolding exchange pathways (15) and can therefore be used to estimate the  $\Delta G$  of global unfolding as:  $\Delta G_{\text{unfolding}} = RT \ln(\langle \text{PF}_{\text{max}} \rangle_{\beta})$ . The values of  $\Delta G_{\text{unfolding}}$  in the apo and holo states can then be related to the ligand dissociation constant by using equation 3 of reference (50):

$$\Delta\Delta G_{\text{unfolding}} \approx \Delta G_{\text{dissociation}} + RT \ln[L]$$

where  $\Delta\Delta G_{\text{unfolding}} = \Delta G_{\text{unfolding}}(\text{Holo}) - \Delta G_{\text{unfolding}}(\text{Apo})$ ,  $\Delta G_{\text{dissociation}} = -RT \ln(K_D)$  and  $[L]$  is the free ligand (*i.e.* cAMP or cGMP) concentration. This equation assumes that the ligand does not bind the denatured protein. In addition, since in all our samples large (*i.e.* mM) excesses of cNMPs were added and  $[\text{cAMP}] \approx [\text{cGMP}]$ , based on the previous equation we also obtain the following equivalence:

$$\Delta\Delta G_{\text{unfolding}}(\text{cAMP}) - \Delta\Delta G_{\text{unfolding}}(\text{cGMP}) \approx -RT \ln(K_{D,\text{cAMP}}/K_{D,\text{cGMP}})$$

where  $\Delta\Delta G_{\text{unfolding}}(\text{cAMP})$  and  $\Delta\Delta G_{\text{unfolding}}(\text{cGMP})$  are the increases of  $\Delta G_{\text{unfolding}}$  caused by cAMP and cGMP binding, respectively. This equation can be further simplified to:

$$\Delta G_{\text{unfolding}}(\text{cAMP}) - \Delta G_{\text{unfolding}}(\text{cGMP}) \approx -RT \ln(K_{D,\text{cAMP}}/K_{D,\text{cGMP}})$$

where  $\Delta G_{\text{unfolding}}(\text{cAMP})$  and  $\Delta G_{\text{unfolding}}(\text{cGMP})$  are the values of  $\Delta G_{\text{unfolding}}$  in the cAMP-bound and cGMP-bound states, respectively.

*Long-Range Perturbations Caused by the Replacement of cAMP with cGMP in EPAC.* cGMP perturbs not only the N-terminus of the PBC, but also the preceding  $\beta 6$  and the adjacent  $\beta 3$  strands, which become more exposed to the solvent (Fig. 5b, Fig. 6b) and overall more dynamic in the ps-ns time-scale (Fig. 9c). In addition, similar effects are also seen for H206, which is located at the edge of  $\alpha 3$  and interacts with the N-terminus of the PBC indirectly through the lid residues in the 308-310 region (Fig. 10e). Long-range cGMP-dependent changes are also initiated by the PBC C-terminus. For instance, the highly conserved R279 in the C-terminal region of the PBC donates a backbone-to-backbone hydrogen-bond to D236, which in turn forms another hydrogen-bond with S233 to stabilize a  $\beta$ -turn between  $\beta 2$  and  $\beta 3$  (Fig. 6c). As cAMP is replaced with cGMP the solvent protection of these three residues decreases dramatically (Fig. 5b, Fig. 6b) and consistently with this increased exposure the overall ps-ns dynamics in the  $\beta 2$ - $\beta 3$  loop and PBC C-terminus is enhanced (Fig. 8d, Fig. 9c). However, despite this destabilization of the  $\beta 2$ -3 region, cGMP leaves largely unaffected G238 (Fig. 2f-l; Fig. 4b,d; Fig. 5b), which is located at the N-terminus of  $\beta 3$  and was previously shown to be a critical component of the allosteric network of this CBD (14, 52, 53).

Another PBC locus affected by cGMP is the short  $\alpha 5$  helix, which becomes less protected from the solvent when cAMP is replaced by cGMP (Fig. 5b; Fig. 6b). This perturbation on  $\alpha 5$  is propagated to the adjacent  $\alpha 6$  (hinge) helix, which in turn is in contact with the NTHB  $\alpha 4$ . As a result, several residues in  $\alpha 6$  and  $\alpha 4$  become more solvent exposed in the cGMP-bound state (Fig. 5b, Fig. 6b). However, the destabilization of helices  $\alpha 4$ -6 by cGMP is only marginal as the chemical shift based secondary structure profiles clearly indicate that the helical probabilities for  $\alpha 4$ -6 do not vary significantly going from the cAMP- to the cGMP-bound state (Fig. S1). This means that cGMP binding results in the stabilization of  $\alpha 5$  and in the destabilization of the last ~two turns of  $\alpha 6$  (Fig. S1), similarly to what previous reported for cAMP (11, 14, 54). This conclusion is also supported by the overall structural similarities between the cAMP- and cGMP-bound states indicated by the chemical shift correlations of Fig. 2f-l.

**Table S1: Interaction Between Nucleotide Base and CBD**

| Protein            | PDB file | Ligand   | Orientation | Interactions between cNMP base and the protein |                                 | Function             |
|--------------------|----------|----------|-------------|------------------------------------------------|---------------------------------|----------------------|
|                    |          |          |             | Hydrophobic                                    | Polar                           |                      |
| PKA-A domain       | 1RGS     | cAMP     | <i>Syn</i>  | Trp260, Ala210, Leu201                         |                                 | Agonist              |
| PKA-B domain       | 1RGS     | cAMP     | <i>Syn</i>  | Tyr 371, Ile325, Val300                        |                                 | Agonist              |
| PKA-A domain       | 1RL3     | cGMP     | <i>Syn</i>  | Trp260, Val182, Ala210, Leu201                 |                                 | Agonist <sup>a</sup> |
| HCN                | 1Q5O     | cAMP     | <i>Anti</i> | Met572, Val564, Arg632 and Ile636              | Arg632 O' → N6                  | Agonist              |
| HCN                | 1Q3E     | cGMP     | <i>Syn</i>  | Met572, Val564, Arg632                         | Thr592 OG1 → N2, Arg632 O' → N1 | Agonist <sup>b</sup> |
| CNG                | 1VP6     | cAMP     | <i>Anti</i> | Val288, Val 282, Arg348                        |                                 | Agonist              |
| EPAC2 <sub>m</sub> | 3CF6     | Sp-cAMPS | <i>Syn</i>  | Leu449, Val386, Ile388, Ala416                 | Lys 450 O' → N6, Lys489 → N1    | Agonist              |
| CAP                | 2CGP     | cAMP     | <i>Anti</i> | Arg123, Val49, Ser62                           | Thr127 OG1 → N6                 | Agonist              |

<sup>a</sup> PKA is activated by > 100 fold excess of cGMP in comparison to cAMP (7, 8). <sup>b</sup> cGMP activates the HCN channels at a ~ten fold higher concentration relative to cAMP (12).

**Table S2. Distance Ranges Measured for the *Syn* and *Anti* Conformations of cAMP**

|      | H1' (Å)                   |                            | H2 (Å)                    |                            | H8 (Å)                    |                            |
|------|---------------------------|----------------------------|---------------------------|----------------------------|---------------------------|----------------------------|
|      | <i>Syn</i> <sup>a,c</sup> | <i>Anti</i> <sup>b,c</sup> | <i>Syn</i> <sup>a,c</sup> | <i>Anti</i> <sup>b,c</sup> | <i>Syn</i> <sup>a,c</sup> | <i>Anti</i> <sup>b,c</sup> |
| H4'  | 2.81-3.02                 | 2.8-2.91                   | 6.15-6.68                 | 7.32-7.45                  | 5.07-5.43                 | 4.60-4.65                  |
| H3'  | 3.69                      | 3.68-3.73                  | 3.91-3.99                 | 7.36-7.53                  | 5.06-5.41                 | 2.81-3.24                  |
| H2'  | 2.68                      | 2.69-2.72                  | 4.67-5.57                 | 5.19-5.56                  | 3.47-4.11                 | 3.46-3.66                  |
| H1'  | N/A                       | N/A                        | 6.09-6.11                 | 4.56-4.62                  | 2.38-2.49                 | 3.63-3.70                  |
| 1H5' | 4.61-4.63                 | 4.56-4.62                  | 3.95-5.24                 | 8.90-8.96                  | 6.34-6.43                 | 3.69-3.91                  |
| 2H5' | 4.57-4.69                 | 4.58-4.64                  | 5.42-6.72                 | 9.10-10.72                 | 6.44-6.86                 | 4.79-4.89                  |

<sup>a</sup> Distance for the *syn* conformation is obtained from the PBD entries 1RGS, 1NE4 and 1NE6  
<sup>b</sup> Distance for the *anti* conformation is obtained from the PBD entries 1VP6, 1Q5O, and 2CGP  
<sup>c</sup> Hydrogen atoms were added using the program Molmol.

**Table S3. Distances Measured for the *Syn* and *Anti* Conformations of cGMP**

|      | H1' (Å)                   |                            | H8 (Å)                    |                            |
|------|---------------------------|----------------------------|---------------------------|----------------------------|
|      | <i>Syn</i> <sup>a,c</sup> | <i>Anti</i> <sup>b,c</sup> | <i>Syn</i> <sup>a,c</sup> | <i>Anti</i> <sup>b,c</sup> |
| H4'  | 2.78                      | 3.13                       | 5.07                      | 4.66                       |
| H3'  | 3.76                      | 3.77                       | 5.44                      | 2.25                       |
| H2'  | 2.72                      | 2.68                       | 4.15                      | 3.20                       |
| H1'  | N/A                       | N/A                        | 2.39                      | 3.96                       |
| 1H5' | 4.51                      | 4.81                       | 6.42                      | 5.27                       |
| 2H5' | 4.69                      | 4.69                       | 6.43                      | 3.98                       |

<sup>a</sup> Distance for the *syn* conformation is obtained from the PBD entry 1RL3  
<sup>b</sup> Distance for the *anti* conformation is obtained from the PBD entry 1MC0  
<sup>c</sup> Hydrogen atoms were added using the program Molmol

**Figure S1.** Covalent structures of cAMP (a) and cGMP (b) and corresponding atom numbering.

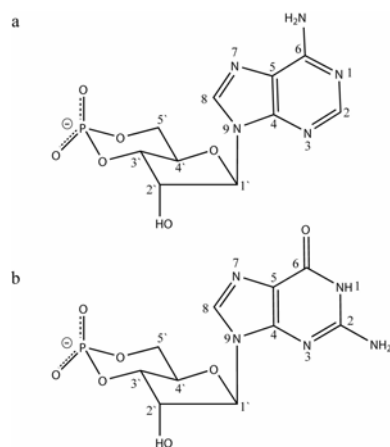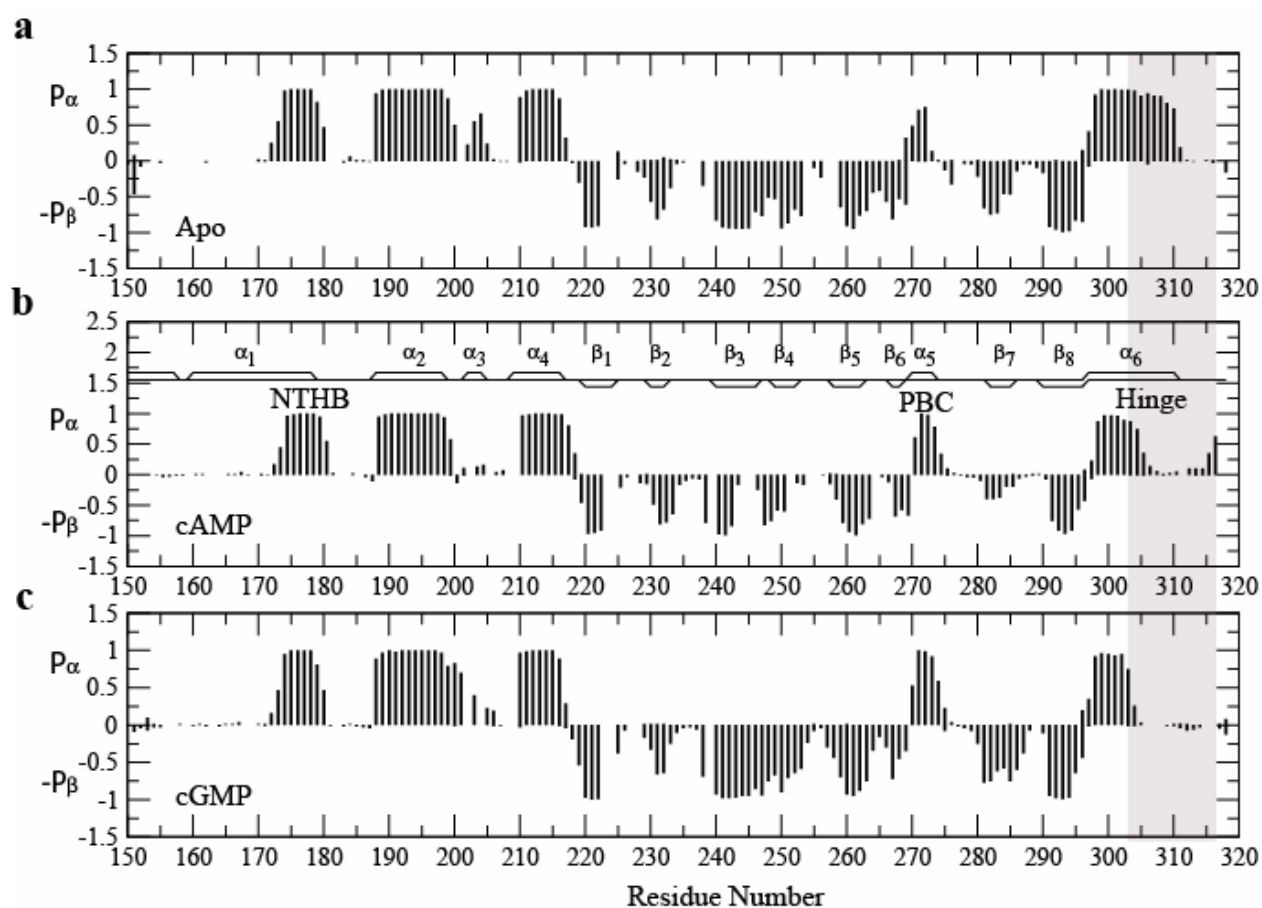

**Figure S2.** Secondary structure probabilities computed based on the observed secondary chemical shifts for apo (14) (a), cAMP-bound (14) (b) and cGMP-bound (c) EPAC1<sub>h</sub> (149-318). The probabilities of  $\alpha$ -helix and  $\beta$ -strand are reported as positive and negative values, respectively. The secondary structure based on the apo EPAC2<sub>m</sub> crystal structure (PDB: 1O7F) is reported in panel b. The C-terminal region, which undergoes similar conformational changes in the cAMP- and cGMP-bound states, is highlighted in grey.
